# Supplementary material
Source: publisher figshare collection journal article supplement (https://acs.figshare.com/ndownloader/files/4485838)
Supplement: Supplementary file 1 [file 4485838]

data_General
_audit_creation_date                  '2009-02-26'
_audit_creation_method                'by CrystalStructure 3.8'
_audit_update_record                   ?

#==============================================================================

# PROCESSING SUMMARY (IUCr Office Use Only)

_journal_date_recd_electronic     ?
_journal_date_from_coeditor       ?
_journal_date_accepted            ?
_journal_coeditor_code            ?

#==============================================================================

# SUBMISSION DETAILS

_publ_contact_author_name             'Yasushi Tsuji'
_publ_contact_author_email            'ytsuji@scl.kyoto-u.ac.jp'
_publ_contact_author_fax              '+81-75-383-2514'
_publ_contact_author_phone            '+81-75-383-2515'
_publ_contact_letter
;
    ENTER TEXT OF LETTER
;
_publ_requested_journal               'J. Am. Chem. Soc.'
_publ_requested_category              'CHOOSE FI FM FO CI CM CO or AD'
_publ_requested_coeditor_name          ?

#==============================================================================

# TITLE AND AUTHOR LIST

_publ_section_title
;
    ENTER SECTION TITLE
;
_publ_section_title_footnote
;
    ENTER FOOTNOTE TO TITLE OF PAPER
;
loop_
_publ_author_name
_publ_author_address
' Tetsuaki Fujihara '
;
Department of Energy and Hydrocarbon Chemistry
Graduate School of Engineering, Kyoto University
Nishikyo-Ku, Kyoto 615-8510, Japan
;
' Yuko Katafuchi '
;
Department of Energy and Hydrocarbon Chemistry
Graduate School of Engineering, Kyoto University
Nishikyo-Ku, Kyoto 615-8510, Japan
;
' Tomohiro Iwai '
;
Department of Energy and Hydrocarbon Chemistry
Graduate School of Engineering, Kyoto University
Nishikyo-Ku, Kyoto 615-8510, Japan
;
' Jun Terao '
;
Department of Energy and Hydrocarbon Chemistry
Graduate School of Engineering, Kyoto University
Nishikyo-Ku, Kyoto 615-8510, Japan
;
' Yasushi Tsuji '
;
Department of Energy and Hydrocarbon Chemistry
Graduate School of Engineering, Kyoto University
Nishikyo-Ku, Kyoto 615-8510, Japan
;
_publ_section_synopsis
;
  ENTER SYNOPSIS
;

#==============================================================================

# TEXT

_publ_section_abstract
;
    ENTER ABSTRACT
;
_publ_section_comment
;
    ENTER TEXT
;
_publ_section_references
;
    ENTER OTHER REFERENCES

    Rigaku/MSC and Rigaku Corporation. (2006).
    CrystalStructure (Version 3.8). 
    Single Crystal Structure Analysis Software.
    Rigaku/MSC, 9009 TX, USA 77381-5209.
    Rigaku, Tokyo 196-8666, Japan.

    Carruthers, J.R., Rollett,J.S., Betteridge, P.W.,
  Kinna, D., Pearce, L., Larsen, A., and Gabe, E.(1999)
    CRYSTALS Issue 11, Chemical Crystallography Laboratory, Oxford, UK.

;
_publ_section_figure_captions
;
    ENTER FIGURE CAPTIONS
;
_publ_section_exptl_prep
;
    ENTER COMPOUND PREPARATION DETAILS
;
_publ_section_exptl_refinement
;
    ENTER SPECIAL DETAILS OF THE REFINEMENT
;

#==============================================================================

data_3a

#==============================================================================

# CHEMICAL DATA

_chemical_formula_sum                  'C17 H17 N O '
_chemical_formula_moiety               'C17 H17 N O '
_chemical_formula_weight               252.34
_chemical_melting_point                ?

#==============================================================================

# CRYSTAL DATA
_symmetry_cell_setting                 monoclinic
_symmetry_space_group_name_H-M        'C 1 2/c 1'
_symmetry_space_group_name_Hall       '-C 2yc'
_symmetry_Int_Tables_number            15
loop_
_symmetry_equiv_pos_site_id
_symmetry_equiv_pos_as_xyz
1   '+X,+Y,+Z'
2   '-X,+Y,1/2-Z'
3   '-X,-Y,-Z'
4   '+X,-Y,1/2+Z'
5   '1/2+X,1/2+Y,+Z'
6   '1/2-X,1/2+Y,1/2-Z'
7   '1/2-X,1/2-Y,-Z'
8   '1/2+X,1/2-Y,1/2+Z'

#------------------------------------------------------------------------------

_cell_length_a                         25.137(17)
_cell_length_b                         6.351(4)
_cell_length_c                         19.808(13)
_cell_angle_alpha                      90.0000
_cell_angle_beta                       116.975(8)
_cell_angle_gamma                      90.0000
_cell_volume                           2818(3)
_cell_formula_units_Z                  8
_cell_measurement_reflns_used          2733
_cell_measurement_theta_min            3.3
_cell_measurement_theta_max            27.4
_cell_measurement_temperature          153.1

#------------------------------------------------------------------------------

_exptl_crystal_description            'plate'
_exptl_crystal_colour                 'colorless'
_exptl_crystal_size_max                0.20
_exptl_crystal_size_mid                0.10
_exptl_crystal_size_min                0.10
_exptl_crystal_density_diffrn          1.189
_exptl_crystal_density_meas            ?
_exptl_crystal_density_method         'not measured'
_exptl_crystal_F_000                   1080.00
_exptl_absorpt_coefficient_mu          0.073
_exptl_absorpt_correction_type         multi-scan
_exptl_absorpt_process_details         
'Jacobson, R. (1998) Private communication'
_exptl_absorpt_correction_T_min        0.839
_exptl_absorpt_correction_T_max        0.985

#==============================================================================

# EXPERIMENTAL DATA

_diffrn_radiation_type                'Mo K\a'
_diffrn_radiation_wavelength           0.71070
_diffrn_measurement_device_type       'Rigaku Saturn'
_diffrn_measurement_method             \w
_diffrn_detector_area_resol_mean       14.63
_diffrn_reflns_number                  10016
_diffrn_reflns_av_R_equivalents        0.067
_diffrn_reflns_theta_max               27.45
_diffrn_measured_fraction_theta_max    0.977
_diffrn_reflns_theta_full              27.45
_diffrn_measured_fraction_theta_full   0.977
_diffrn_reflns_limit_h_min             -32
_diffrn_reflns_limit_h_max             32
_diffrn_reflns_limit_k_min             -8
_diffrn_reflns_limit_k_max             5
_diffrn_reflns_limit_l_min             -20
_diffrn_reflns_limit_l_max             24

#==============================================================================

# REFINEMENT DATA

_refine_special_details
;
    Refinement was performed using all reflections. The weighted 
    R-factor (wR) and goodness of fit (S) are based on F^2^.
    R-factor (gt) are based on F. The threshold expression of
    F^2^ > 2.0 sigma(F^2^) is used only for calculating R-factor (gt).
;
_reflns_number_total                   3150
_reflns_number_gt                      1817
_reflns_threshold_expression           F^2^>2.0\s(F^2^)
_refine_ls_structure_factor_coef       Fsqd
_refine_ls_R_factor_gt                 0.0659
_refine_ls_wR_factor_ref               0.1528
_refine_ls_hydrogen_treatment          refall
_refine_ls_number_reflns               3150
_refine_ls_number_parameters           189
_refine_ls_goodness_of_fit_ref         1.003
_refine_ls_weighting_scheme            calc
_refine_ls_weighting_details
'w = 1/[0.0002Fo^2^ + 1.0000\s(Fo^2^)]/(4Fo^2^)'
_refine_ls_shift/su_max                0.0000
_refine_diff_density_max               0.53
_refine_diff_density_min               -0.36
_refine_ls_extinction_method           none
_refine_ls_extinction_coef             ?

loop_
_atom_type_symbol
_atom_type_description
_atom_type_scat_dispersion_real
_atom_type_scat_dispersion_imag
_atom_type_scat_source
  'C' 'C'  0.003 0.002 
;
International Tables for Crystallography
(1992, Vol. C, Tables 4.2.6.8 and 6.1.1.4)
;
  'H' 'H'  0.000 0.000 
;
International Tables for Crystallography
(1992, Vol. C, Table 6.1.1.4)
;
  'N' 'N'  0.006 0.003 
;
International Tables for Crystallography
(1992, Vol. C, Tables 4.2.6.8 and 6.1.1.4)
;
  'O' 'O'  0.011 0.006 
;
International Tables for Crystallography
(1992, Vol. C, Tables 4.2.6.8 and 6.1.1.4)
;

#==============================================================================

# ATOMIC COORDINATES AND THERMAL PARAMETERS

loop_
_atom_site_label
_atom_site_type_symbol
_atom_site_fract_x
_atom_site_fract_y
_atom_site_fract_z
_atom_site_U_iso_or_equiv
_atom_site_adp_type
_atom_site_occupancy
_atom_site_symmetry_multiplicity
_atom_site_calc_flag
_atom_site_refinement_flags
_atom_site_disorder_assembly
_atom_site_disorder_group
 O(1) O 0.05921(9) 0.0615(2) 0.63311(9) 0.0362(5) Uani 1.00 1 d . . .
 N(1) N 0.06365(10) 0.4056(3) 0.60742(12) 0.0345(6) Uani 1.00 1 d . . .
 C(1) C 0.17612(11) 0.1604(3) 0.60543(13) 0.0271(6) Uani 1.00 1 d . . .
 C(2) C 0.20555(12) 0.0890(4) 0.68043(14) 0.0345(7) Uani 1.00 1 d . . .
 C(3) C 0.26627(13) 0.1056(4) 0.72124(15) 0.0420(8) Uani 1.00 1 d . . .
 C(4) C 0.29953(13) 0.1977(4) 0.68985(16) 0.0429(8) Uani 1.00 1 d . . .
 C(5) C 0.27156(13) 0.2711(4) 0.61624(16) 0.0406(8) Uani 1.00 1 d . . .
 C(6) C 0.21063(13) 0.2530(4) 0.57466(14) 0.0339(7) Uani 1.00 1 d . . .
 C(7) C 0.11045(11) 0.1431(3) 0.56124(12) 0.0258(6) Uani 1.00 1 d . . .
 C(8) C 0.08017(12) 0.0738(3) 0.49036(13) 0.0301(7) Uani 1.00 1 d . . .
 C(9) C 0.10285(12) -0.0250(3) 0.44103(13) 0.0294(6) Uani 1.00 1 d . . .
 C(10) C 0.15085(12) -0.1645(3) 0.46833(14) 0.0327(7) Uani 1.00 1 d . . .
 C(11) C 0.16820(13) -0.2632(4) 0.41917(15) 0.0390(8) Uani 1.00 1 d . . .
 C(12) C 0.13849(14) -0.2212(4) 0.34206(15) 0.0395(8) Uani 1.00 1 d . . .
 C(13) C 0.09073(13) -0.0831(4) 0.31408(15) 0.0383(8) Uani 1.00 1 d . . .
 C(14) C 0.07271(12) 0.0130(4) 0.36328(13) 0.0343(7) Uani 1.00 1 d . . .
 C(15) C 0.07568(11) 0.2016(3) 0.60364(13) 0.0282(6) Uani 1.00 1 d . . .
 C(16) C 0.08194(14) 0.5728(4) 0.57241(16) 0.0443(8) Uani 1.00 1 d . . .
 C(17) C 0.02835(14) 0.4679(4) 0.64603(15) 0.0446(9) Uani 1.00 1 d . . .
 H(1) H 0.1827 0.0280 0.7026 0.040 Uiso 1.00 1 c R . .
 H(2) H 0.2856 0.0544 0.7718 0.046 Uiso 1.00 1 c R . .
 H(3) H 0.3416 0.2103 0.7186 0.049 Uiso 1.00 1 c R . .
 H(4) H 0.2945 0.3332 0.5943 0.052 Uiso 1.00 1 c R . .
 H(5) H 0.1914 0.3035 0.5240 0.042 Uiso 1.00 1 c R . .
 H(6) H 0.0381 0.0898 0.4685 0.037 Uiso 1.00 1 c R . .
 H(7) H 0.1714 -0.1932 0.5211 0.040 Uiso 1.00 1 c R . .
 H(8) H 0.2008 -0.3587 0.4383 0.049 Uiso 1.00 1 c R . .
 H(9) H 0.1510 -0.2883 0.3088 0.050 Uiso 1.00 1 c R . .
 H(10) H 0.0706 -0.0533 0.2614 0.047 Uiso 1.00 1 c R . .
 H(11) H 0.0394 0.1054 0.3442 0.041 Uiso 1.00 1 c R . .
 H(12) H 0.1203 0.6228 0.6072 0.055 Uiso 1.00 1 c R . .
 H(13) H 0.0539 0.6847 0.5588 0.055 Uiso 1.00 1 c R . .
 H(14) H 0.0834 0.5207 0.5283 0.055 Uiso 1.00 1 c R . .
 H(15) H -0.0128 0.4690 0.6106 0.057 Uiso 1.00 1 c R . .
 H(16) H 0.0399 0.6041 0.6676 0.057 Uiso 1.00 1 c R . .
 H(17) H 0.0348 0.3688 0.6849 0.057 Uiso 1.00 1 c R . .


loop_
_atom_site_aniso_label
_atom_site_aniso_U_11
_atom_site_aniso_U_22
_atom_site_aniso_U_33
_atom_site_aniso_U_12
_atom_site_aniso_U_13
_atom_site_aniso_U_23
 O(1) 0.0481(12) 0.0333(10) 0.0361(10) -0.0016(9) 0.0268(9) 0.0016(8)
 N(1) 0.0429(14) 0.0283(11) 0.0389(12) 0.0056(10) 0.0244(11) 0.0019(9)
 C(1) 0.0301(14) 0.0221(12) 0.0289(12) -0.0004(10) 0.0130(11) -0.0034(10)
 C(2) 0.0376(16) 0.0303(14) 0.0331(14) -0.0004(12) 0.0139(12) 0.0020(11)
 C(3) 0.0391(17) 0.0368(15) 0.0389(15) 0.0025(13) 0.0080(13) 0.0022(12)
 C(4) 0.0293(16) 0.0351(15) 0.0581(18) -0.0007(12) 0.0142(14) -0.0099(14)
 C(5) 0.0409(17) 0.0377(15) 0.0514(17) -0.0084(13) 0.0281(14) -0.0105(13)
 C(6) 0.0391(16) 0.0317(14) 0.0335(14) -0.0044(12) 0.0188(13) -0.0040(11)
 C(7) 0.0320(14) 0.0239(12) 0.0245(12) 0.0005(10) 0.0156(11) 0.0025(9)
 C(8) 0.0328(15) 0.0289(13) 0.0316(13) 0.0033(11) 0.0171(12) 0.0032(10)
 C(9) 0.0336(14) 0.0285(12) 0.0286(13) -0.0041(11) 0.0162(11) -0.0021(10)
 C(10) 0.0374(16) 0.0305(13) 0.0323(14) -0.0003(12) 0.0176(12) -0.0015(11)
 C(11) 0.0442(18) 0.0319(14) 0.0460(16) 0.0027(13) 0.0249(14) -0.0053(12)
 C(12) 0.0495(18) 0.0371(15) 0.0390(15) -0.0030(14) 0.0264(14) -0.0102(13)
 C(13) 0.0450(18) 0.0422(16) 0.0298(14) -0.0052(13) 0.0188(13) -0.0060(12)
 C(14) 0.0342(15) 0.0378(14) 0.0300(13) -0.0009(12) 0.0138(12) -0.0034(11)
 C(15) 0.0321(14) 0.0278(12) 0.0221(12) 0.0000(11) 0.0100(11) -0.0002(10)
 C(16) 0.055(2) 0.0281(14) 0.0522(18) 0.0021(13) 0.0267(16) 0.0040(12)
 C(17) 0.053(2) 0.0425(16) 0.0455(17) 0.0112(15) 0.0288(16) -0.0010(13)

#==============================================================================

_computing_data_collection            'CrystalClear'
_computing_cell_refinement            'CrystalClear'
_computing_data_reduction             'CrystalStructure'
_computing_structure_solution         'SIR97'
_computing_structure_refinement       'CRYSTALS'
_computing_publication_material       'CrystalStructure 3.8'
_computing_molecular_graphics          ?

#==============================================================================

# MOLECULAR GEOMETRY

_geom_special_details
;
    ENTER SPECIAL DETAILS OF THE MOLECULAR GEOMETRY
;

loop_
_geom_bond_atom_site_label_1
_geom_bond_atom_site_label_2
_geom_bond_distance
_geom_bond_publ_flag
_geom_bond_site_symmetry_1
_geom_bond_site_symmetry_2
O(1) C(15) 1.234(3) yes . .
N(1) C(15) 1.340(3) yes . .
N(1) C(16) 1.452(4) yes . .
N(1) C(17) 1.464(4) yes . .
C(1) C(2) 1.401(3) yes . .
C(1) C(6) 1.396(4) yes . .
C(1) C(7) 1.481(3) yes . .
C(2) C(3) 1.369(3) yes . .
C(3) C(4) 1.378(5) yes . .
C(4) C(5) 1.381(3) yes . .
C(5) C(6) 1.376(3) yes . .
C(7) C(8) 1.332(3) yes . .
C(7) C(15) 1.508(4) yes . .
C(8) C(9) 1.476(4) yes . .
C(9) C(10) 1.393(3) yes . .
C(9) C(14) 1.395(3) yes . .
C(10) C(11) 1.384(4) yes . .
C(11) C(12) 1.388(3) yes . .
C(12) C(13) 1.383(4) yes . .
C(13) C(14) 1.388(4) yes . .
C(2) H(1) 0.950(4) no . .
C(3) H(2) 0.950(3) no . .
C(4) H(3) 0.950(3) no . .
C(5) H(4) 0.950(5) no . .
C(6) H(5) 0.950(3) no . .
C(8) H(6) 0.950(3) no . .
C(10) H(7) 0.950(3) no . .
C(11) H(8) 0.950(3) no . .
C(12) H(9) 0.950(5) no . .
C(13) H(10) 0.950(3) no . .
C(14) H(11) 0.950(3) no . .
C(16) H(12) 0.950 no . .
C(16) H(13) 0.950 no . .
C(16) H(14) 0.950 no . .
C(17) H(15) 0.950 no . .
C(17) H(16) 0.950 no . .
C(17) H(17) 0.950 no . .

loop_
_geom_angle_atom_site_label_1
_geom_angle_atom_site_label_2
_geom_angle_atom_site_label_3
_geom_angle
_geom_angle_publ_flag
_geom_angle_site_symmetry_1
_geom_angle_site_symmetry_2
_geom_angle_site_symmetry_3
C(15) N(1) C(16) 123.5(2) yes . . .
C(15) N(1) C(17) 119.7(2) yes . . .
C(16) N(1) C(17) 116.8(2) yes . . .
C(2) C(1) C(6) 117.7(2) yes . . .
C(2) C(1) C(7) 120.9(2) yes . . .
C(6) C(1) C(7) 121.3(2) yes . . .
C(1) C(2) C(3) 120.8(3) yes . . .
C(2) C(3) C(4) 120.6(2) yes . . .
C(3) C(4) C(5) 119.8(2) yes . . .
C(4) C(5) C(6) 120.0(3) yes . . .
C(1) C(6) C(5) 121.1(2) yes . . .
C(1) C(7) C(8) 126.8(2) yes . . .
C(1) C(7) C(15) 115.15(19) yes . . .
C(8) C(7) C(15) 118.0(2) yes . . .
C(7) C(8) C(9) 129.1(2) yes . . .
C(8) C(9) C(10) 122.7(2) yes . . .
C(8) C(9) C(14) 118.5(2) yes . . .
C(10) C(9) C(14) 118.7(2) yes . . .
C(9) C(10) C(11) 120.6(2) yes . . .
C(10) C(11) C(12) 120.2(2) yes . . .
C(11) C(12) C(13) 119.9(3) yes . . .
C(12) C(13) C(14) 119.8(2) yes . . .
C(9) C(14) C(13) 120.8(2) yes . . .
O(1) C(15) N(1) 122.6(2) yes . . .
O(1) C(15) C(7) 119.3(2) yes . . .
N(1) C(15) C(7) 118.2(2) yes . . .
C(1) C(2) H(1) 118.9(2) no . . .
C(3) C(2) H(1) 120.3(2) no . . .
C(2) C(3) H(2) 119.7(4) no . . .
C(4) C(3) H(2) 119.7(3) no . . .
C(3) C(4) H(3) 120.2(3) no . . .
C(5) C(4) H(3) 120.0(4) no . . .
C(4) C(5) H(4) 119.9(3) no . . .
C(6) C(5) H(4) 120.1(3) no . . .
C(1) C(6) H(5) 118.9(3) no . . .
C(5) C(6) H(5) 120.0(3) no . . .
C(7) C(8) H(6) 115.5(3) no . . .
C(9) C(8) H(6) 115.4(2) no . . .
C(9) C(10) H(7) 119.5(3) no . . .
C(11) C(10) H(7) 119.9(3) no . . .
C(10) C(11) H(8) 119.9(3) no . . .
C(12) C(11) H(8) 119.9(3) no . . .
C(11) C(12) H(9) 119.6(3) no . . .
C(13) C(12) H(9) 120.5(2) no . . .
C(12) C(13) H(10) 120.0(3) no . . .
C(14) C(13) H(10) 120.2(3) no . . .
C(9) C(14) H(11) 119.0(3) no . . .
C(13) C(14) H(11) 120.2(2) no . . .
N(1) C(16) H(12) 109.6 no . . .
N(1) C(16) H(13) 109.1 no . . .
N(1) C(16) H(14) 109.7 no . . .
H(12) C(16) H(13) 109.5 no . . .
H(12) C(16) H(14) 109.5 no . . .
H(13) C(16) H(14) 109.5 no . . .
N(1) C(17) H(15) 109.3 no . . .
N(1) C(17) H(16) 110.3 no . . .
N(1) C(17) H(17) 108.8 no . . .
H(15) C(17) H(16) 109.5 no . . .
H(15) C(17) H(17) 109.5 no . . .
H(16) C(17) H(17) 109.5 no . . .

loop_
_geom_torsion_atom_site_label_1
_geom_torsion_atom_site_label_2
_geom_torsion_atom_site_label_3
_geom_torsion_atom_site_label_4
_geom_torsion
_geom_torsion_publ_flag
_geom_torsion_site_symmetry_1
_geom_torsion_site_symmetry_2
_geom_torsion_site_symmetry_3
_geom_torsion_site_symmetry_4
C(16) N(1) C(15) O(1) -179.22(19) ? . . . .
C(16) N(1) C(15) C(7) 0.5(2) ? . . . .
C(17) N(1) C(15) O(1) -1.6(3) ? . . . .
C(17) N(1) C(15) C(7) 178.06(18) ? . . . .
C(2) C(1) C(6) C(5) 0.8(4) ? . . . .
C(6) C(1) C(2) C(3) -1.4(3) ? . . . .
C(2) C(1) C(7) C(8) -134.0(2) ? . . . .
C(2) C(1) C(7) C(15) 42.9(3) ? . . . .
C(7) C(1) C(2) C(3) -179.8(2) ? . . . .
C(6) C(1) C(7) C(8) 47.7(3) ? . . . .
C(6) C(1) C(7) C(15) -135.4(2) ? . . . .
C(7) C(1) C(6) C(5) 179.2(2) ? . . . .
C(1) C(2) C(3) C(4) 1.5(4) ? . . . .
C(2) C(3) C(4) C(5) -1.0(4) ? . . . .
C(3) C(4) C(5) C(6) 0.3(4) ? . . . .
C(4) C(5) C(6) C(1) -0.3(4) ? . . . .
C(1) C(7) C(8) C(9) 7.8(4) ? . . . .
C(1) C(7) C(15) O(1) -96.5(2) ? . . . .
C(1) C(7) C(15) N(1) 83.8(2) ? . . . .
C(8) C(7) C(15) O(1) 80.8(2) ? . . . .
C(8) C(7) C(15) N(1) -98.9(2) ? . . . .
C(15) C(7) C(8) C(9) -169.0(2) ? . . . .
C(7) C(8) C(9) C(10) 37.3(4) ? . . . .
C(7) C(8) C(9) C(14) -146.7(2) ? . . . .
C(8) C(9) C(10) C(11) 176.0(2) ? . . . .
C(8) C(9) C(14) C(13) -177.3(2) ? . . . .
C(10) C(9) C(14) C(13) -1.1(4) ? . . . .
C(14) C(9) C(10) C(11) -0.0(3) ? . . . .
C(9) C(10) C(11) C(12) 1.1(4) ? . . . .
C(10) C(11) C(12) C(13) -1.1(4) ? . . . .
C(11) C(12) C(13) C(14) 0.0(4) ? . . . .
C(12) C(13) C(14) C(9) 1.1(4) ? . . . .

loop_
_geom_contact_atom_site_label_1
_geom_contact_atom_site_label_2
_geom_contact_distance
_geom_contact_publ_flag
_geom_contact_site_symmetry_1
_geom_contact_site_symmetry_2
O(1) N(1) 2.258(2) ? . .
O(1) C(1) 3.285(3) ? . .
O(1) C(2) 3.363(3) ? . .
O(1) C(7) 2.370(3) ? . .
O(1) C(8) 3.103(3) ? . .
O(1) C(8) 3.350(2) ? . 3_556
O(1) C(13) 3.304(3) ? . 4_555
O(1) C(14) 3.382(4) ? . 3_556
O(1) C(16) 3.468(3) ? . 1_545
O(1) C(16) 3.597(3) ? . .
O(1) C(17) 2.740(3) ? . .
N(1) O(1) 2.258(2) ? . .
N(1) C(1) 3.244(3) ? . .
N(1) C(7) 2.445(3) ? . .
N(1) C(8) 3.296(3) ? . .
C(1) O(1) 3.285(3) ? . .
C(1) N(1) 3.244(3) ? . .
C(1) C(3) 2.409(3) ? . .
C(1) C(4) 2.787(3) ? . .
C(1) C(5) 2.414(4) ? . .
C(1) C(8) 2.515(2) ? . .
C(1) C(9) 3.153(3) ? . .
C(1) C(10) 3.236(3) ? . .
C(1) C(15) 2.522(4) ? . .
C(1) C(16) 3.389(3) ? . .
C(2) O(1) 3.363(3) ? . .
C(2) C(3) 3.531(3) ? . 6_546
C(2) C(4) 2.386(4) ? . .
C(2) C(5) 2.761(5) ? . .
C(2) C(6) 2.394(4) ? . .
C(2) C(7) 2.507(2) ? . .
C(2) C(15) 2.996(3) ? . .
C(3) C(1) 2.409(3) ? . .
C(3) C(2) 3.531(3) ? . 6_556
C(3) C(3) 3.591(4) ? . 6_546
C(3) C(3) 3.591(4) ? . 6_556
C(3) C(5) 2.387(4) ? . .
C(3) C(6) 2.753(3) ? . .
C(4) C(1) 2.787(3) ? . .
C(4) C(2) 2.386(4) ? . .
C(4) C(6) 2.387(3) ? . .
C(4) C(12) 3.589(4) ? . 7_546
C(5) C(1) 2.414(4) ? . .
C(5) C(2) 2.761(5) ? . .
C(5) C(3) 2.387(4) ? . .
C(5) C(12) 3.503(4) ? . 7_556
C(6) C(2) 2.394(4) ? . .
C(6) C(3) 2.753(3) ? . .
C(6) C(4) 2.387(3) ? . .
C(6) C(7) 2.508(4) ? . .
C(6) C(8) 3.142(3) ? . .
C(6) C(9) 3.310(3) ? . .
C(6) C(10) 3.294(3) ? . .
C(7) O(1) 2.370(3) ? . .
C(7) N(1) 2.445(3) ? . .
C(7) C(2) 2.507(2) ? . .
C(7) C(6) 2.508(4) ? . .
C(7) C(9) 2.536(3) ? . .
C(7) C(10) 3.151(4) ? . .
C(7) C(16) 2.855(3) ? . .
C(8) O(1) 3.103(3) ? . .
C(8) O(1) 3.350(2) ? . 3_556
C(8) N(1) 3.296(3) ? . .
C(8) C(1) 2.515(2) ? . .
C(8) C(6) 3.142(3) ? . .
C(8) C(10) 2.518(4) ? . .
C(8) C(14) 2.468(3) ? . .
C(8) C(15) 2.436(4) ? . .
C(8) C(16) 3.564(3) ? . 1_545
C(8) C(16) 3.552(3) ? . .
C(9) C(1) 3.153(3) ? . .
C(9) C(6) 3.310(3) ? . .
C(9) C(7) 2.536(3) ? . .
C(9) C(11) 2.412(4) ? . .
C(9) C(12) 2.791(4) ? . .
C(9) C(13) 2.420(4) ? . .
C(10) C(1) 3.236(3) ? . .
C(10) C(6) 3.294(3) ? . .
C(10) C(7) 3.151(4) ? . .
C(10) C(8) 2.518(4) ? . .
C(10) C(12) 2.403(4) ? . .
C(10) C(13) 2.774(3) ? . .
C(10) C(14) 2.398(3) ? . .
C(11) C(9) 2.412(4) ? . .
C(11) C(13) 2.399(3) ? . .
C(11) C(14) 2.766(3) ? . .
C(12) C(4) 3.589(4) ? . 7_546
C(12) C(5) 3.503(4) ? . 7_556
C(12) C(9) 2.791(4) ? . .
C(12) C(10) 2.403(4) ? . .
C(12) C(14) 2.398(4) ? . .
C(13) O(1) 3.304(3) ? . 4_554
C(13) C(9) 2.420(4) ? . .
C(13) C(10) 2.774(3) ? . .
C(13) C(11) 2.399(3) ? . .
C(14) O(1) 3.382(4) ? . 3_556
C(14) C(8) 2.468(3) ? . .
C(14) C(10) 2.398(3) ? . .
C(14) C(11) 2.766(3) ? . .
C(14) C(12) 2.398(4) ? . .
C(15) C(1) 2.522(4) ? . .
C(15) C(2) 2.996(3) ? . .
C(15) C(8) 2.436(4) ? . .
C(15) C(16) 2.460(3) ? . .
C(15) C(17) 2.426(4) ? . .
C(16) O(1) 3.597(3) ? . .
C(16) O(1) 3.468(3) ? . 1_565
C(16) C(1) 3.389(3) ? . .
C(16) C(7) 2.855(3) ? . .
C(16) C(8) 3.552(3) ? . .
C(16) C(8) 3.564(3) ? . 1_565
C(16) C(15) 2.460(3) ? . .
C(16) C(17) 2.483(5) ? . .
C(17) O(1) 2.740(3) ? . .
C(17) C(15) 2.426(4) ? . .
C(17) C(16) 2.483(5) ? . .
O(1) H(1) 2.775(3) ? . .
O(1) H(6) 3.061(3) ? . .
O(1) H(6) 2.547(2) ? . 3_556
O(1) H(9) 3.497(2) ? . 4_555
O(1) H(10) 2.425(3) ? . 4_555
O(1) H(11) 2.911(4) ? . 3_556
O(1) H(12) 3.331 ? . 1_545
O(1) H(13) 2.780 ? . 1_545
O(1) H(15) 3.072 ? . .
O(1) H(16) 3.072 ? . 1_545
O(1) H(16) 3.589 ? . .
O(1) H(17) 2.410 ? . .
N(1) H(2) 3.571(3) ? . 6_556
N(1) H(6) 3.225(3) ? . .
N(1) H(12) 1.984 ? . .
N(1) H(13) 1.978 ? . .
N(1) H(13) 3.328 ? . 3_566
N(1) H(14) 1.985 ? . .
N(1) H(14) 3.478 ? . 3_566
N(1) H(15) 1.991 ? . .
N(1) H(16) 2.003 ? . .
N(1) H(17) 1.986 ? . .
C(1) H(1) 2.038(3) ? . .
C(1) H(2) 3.264(3) ? . .
C(1) H(2) 3.314(3) ? . 6_556
C(1) H(4) 3.270(4) ? . .
C(1) H(5) 2.033(4) ? . .
C(1) H(6) 3.326(3) ? . .
C(1) H(7) 2.769(3) ? . .
C(1) H(12) 3.262 ? . .
C(1) H(14) 3.126 ? . .
C(2) H(2) 2.017(3) ? . .
C(2) H(2) 3.504(3) ? . 6_546
C(2) H(2) 3.081(3) ? . 6_556
C(2) H(3) 3.243(4) ? . .
C(2) H(5) 3.253(4) ? . .
C(2) H(7) 3.384(3) ? . .
C(2) H(12) 3.555 ? . 1_545
C(3) H(1) 2.022(4) ? . .
C(3) H(1) 3.059(3) ? . 6_556
C(3) H(2) 3.163(4) ? . 6_556
C(3) H(3) 2.030(4) ? . .
C(3) H(4) 3.245(4) ? . .
C(3) H(9) 3.140(4) ? . 7_546
C(3) H(12) 3.302 ? . 6_546
C(4) H(1) 3.244(4) ? . .
C(4) H(1) 2.876(4) ? . 6_556
C(4) H(2) 2.025(4) ? . .
C(4) H(2) 3.430(4) ? . 6_556
C(4) H(4) 2.029(4) ? . .
C(4) H(5) 3.245(3) ? . .
C(4) H(8) 3.326(4) ? . 7_546
C(4) H(9) 2.877(4) ? . 7_546
C(5) H(2) 3.244(4) ? . .
C(5) H(3) 2.030(3) ? . .
C(5) H(5) 2.025(3) ? . .
C(5) H(5) 3.341(5) ? . 7_556
C(5) H(8) 3.031(4) ? . 7_546
C(5) H(9) 3.573(3) ? . 7_546
C(6) H(1) 3.252(4) ? . .
C(6) H(2) 3.559(4) ? . 6_556
C(6) H(3) 3.244(3) ? . .
C(6) H(4) 2.027(4) ? . .
C(6) H(4) 3.336(4) ? . 7_556
C(6) H(7) 3.030(3) ? . .
C(6) H(8) 3.582(4) ? . 1_565
C(6) H(8) 3.436(4) ? . 7_546
C(6) H(12) 3.524 ? . .
C(6) H(14) 3.361 ? . .
C(7) H(1) 2.657(2) ? . .
C(7) H(5) 2.661(4) ? . .
C(7) H(6) 1.941(2) ? . .
C(7) H(7) 2.941(4) ? . .
C(7) H(12) 3.406 ? . 1_545
C(7) H(12) 3.157 ? . .
C(7) H(13) 3.230 ? . 1_545
C(7) H(14) 2.497 ? . .
C(8) H(5) 2.949(4) ? . .
C(8) H(6) 3.573(4) ? . 3_556
C(8) H(7) 2.691(3) ? . .
C(8) H(11) 2.603(3) ? . .
C(8) H(12) 3.530 ? . 1_545
C(8) H(13) 3.032 ? . 1_545
C(8) H(13) 3.418 ? . 3_566
C(8) H(14) 3.585 ? . 1_545
C(8) H(14) 2.927 ? . .
C(8) H(15) 3.497 ? . 3_566
C(9) H(4) 3.206(4) ? . 7_556
C(9) H(5) 2.948(3) ? . .
C(9) H(6) 2.070(4) ? . .
C(9) H(7) 2.036(3) ? . .
C(9) H(8) 3.268(4) ? . .
C(9) H(10) 3.276(3) ? . .
C(9) H(11) 2.033(3) ? . .
C(9) H(14) 3.510 ? . 1_545
C(9) H(15) 3.467 ? . 3_556
C(10) H(4) 3.066(4) ? . 7_556
C(10) H(5) 3.557(3) ? . 1_545
C(10) H(5) 3.173(3) ? . .
C(10) H(6) 3.264(4) ? . .
C(10) H(8) 2.032(4) ? . .
C(10) H(8) 3.330(3) ? . 7_546
C(10) H(9) 3.258(4) ? . .
C(10) H(11) 3.253(3) ? . .
C(10) H(12) 3.449 ? . 1_545
C(10) H(14) 3.180 ? . 1_545
C(11) H(4) 2.939(4) ? . 7_556
C(11) H(5) 3.336(3) ? . 1_545
C(11) H(7) 2.033(4) ? . .
C(11) H(8) 3.313(3) ? . 7_546
C(11) H(9) 2.033(4) ? . .
C(11) H(10) 3.257(3) ? . .
C(12) H(3) 3.448(4) ? . 7_546
C(12) H(3) 3.573(4) ? . 7_556
C(12) H(4) 2.928(3) ? . 7_556
C(12) H(7) 3.260(4) ? . .
C(12) H(8) 2.036(3) ? . .
C(12) H(10) 2.032(3) ? . .
C(12) H(11) 3.257(4) ? . .
C(12) H(17) 3.162 ? . 4_554
C(13) H(3) 3.149(4) ? . 7_556
C(13) H(4) 3.064(3) ? . 7_556
C(13) H(8) 3.256(3) ? . .
C(13) H(9) 2.037(4) ? . .
C(13) H(11) 2.039(4) ? . .
C(13) H(11) 3.557(3) ? . 2_555
C(13) H(17) 2.924 ? . 4_554
C(14) H(4) 3.204(4) ? . 7_556
C(14) H(6) 2.644(4) ? . .
C(14) H(7) 3.257(3) ? . .
C(14) H(9) 3.260(4) ? . .
C(14) H(10) 2.039(4) ? . .
C(14) H(10) 3.343(3) ? . 2_555
C(14) H(15) 3.552 ? . 3_556
C(14) H(16) 3.567 ? . 3_566
C(14) H(17) 3.429 ? . 3_556
C(15) H(1) 2.741(3) ? . .
C(15) H(6) 2.503(3) ? . .
C(15) H(6) 3.152(3) ? . 3_556
C(15) H(10) 3.321(4) ? . 4_555
C(15) H(12) 2.889 ? . .
C(15) H(13) 3.380 ? . 1_545
C(15) H(13) 3.172 ? . .
C(15) H(13) 3.461 ? . 3_566
C(15) H(14) 2.575 ? . .
C(15) H(15) 2.850 ? . .
C(15) H(16) 3.160 ? . .
C(15) H(17) 2.505 ? . .
C(16) H(2) 3.362(3) ? . 6_556
C(16) H(6) 3.577(3) ? . .
C(16) H(6) 3.483(4) ? . 3_566
C(16) H(7) 3.221(5) ? . 1_565
C(16) H(15) 2.882 ? . .
C(16) H(15) 3.243 ? . 3_566
C(16) H(16) 2.553 ? . .
C(16) H(17) 3.231 ? . .
C(17) H(3) 3.506(3) ? . 6_556
C(17) H(6) 3.520(3) ? . 3_566
C(17) H(9) 3.491(3) ? . 4_555
C(17) H(10) 3.328(3) ? . 4_555
C(17) H(11) 3.252(4) ? . 3_566
C(17) H(12) 2.918 ? . .
C(17) H(13) 2.509 ? . .
C(17) H(14) 3.223 ? . .
C(17) H(14) 3.320 ? . 3_566
H(1) O(1) 2.775(3) ? . .
H(1) C(1) 2.038(3) ? . .
H(1) C(3) 2.022(4) ? . .
H(1) C(3) 3.059(3) ? . 6_546
H(1) C(4) 3.244(4) ? . .
H(1) C(4) 2.876(4) ? . 6_546
H(1) C(6) 3.252(4) ? . .
H(1) C(7) 2.657(2) ? . .
H(1) C(15) 2.741(3) ? . .
H(1) H(2) 2.319(3) ? . .
H(1) H(2) 3.094(3) ? . 6_546
H(1) H(2) 3.421(3) ? . 6_556
H(1) H(3) 2.782(4) ? . 6_546
H(1) H(9) 3.052(4) ? . 4_555
H(1) H(10) 3.507(5) ? . 4_555
H(1) H(12) 3.157 ? . 1_545
H(2) N(1) 3.571(3) ? . 6_546
H(2) C(1) 3.264(3) ? . .
H(2) C(1) 3.314(3) ? . 6_546
H(2) C(2) 2.017(3) ? . .
H(2) C(2) 3.081(3) ? . 6_546
H(2) C(2) 3.504(3) ? . 6_556
H(2) C(3) 3.163(4) ? . 6_546
H(2) C(4) 2.025(4) ? . .
H(2) C(4) 3.430(4) ? . 6_546
H(2) C(5) 3.244(4) ? . .
H(2) C(6) 3.559(4) ? . 6_546
H(2) C(16) 3.362(3) ? . 6_546
H(2) H(1) 2.319(3) ? . .
H(2) H(1) 3.421(3) ? . 6_546
H(2) H(1) 3.094(3) ? . 6_556
H(2) H(2) 3.553(3) ? . 6_546
H(2) H(2) 3.553(3) ? . 6_556
H(2) H(3) 2.327(5) ? . .
H(2) H(9) 3.202(5) ? . 7_546
H(2) H(12) 2.528 ? . 6_546
H(3) C(2) 3.243(4) ? . .
H(3) C(3) 2.030(4) ? . .
H(3) C(5) 2.030(3) ? . .
H(3) C(6) 3.244(3) ? . .
H(3) C(12) 3.448(4) ? . 7_546
H(3) C(12) 3.573(4) ? . 7_556
H(3) C(13) 3.149(4) ? . 7_556
H(3) C(17) 3.506(3) ? . 6_546
H(3) H(1) 2.782(4) ? . 6_556
H(3) H(2) 2.327(5) ? . .
H(3) H(4) 2.330(3) ? . .
H(3) H(8) 3.575(4) ? . 7_546
H(3) H(9) 2.757(3) ? . 7_546
H(3) H(10) 2.997(4) ? . 7_556
H(3) H(12) 3.183 ? . 6_546
H(3) H(16) 2.884 ? . 6_546
H(3) H(17) 3.552 ? . 6_546
H(4) C(1) 3.270(4) ? . .
H(4) C(3) 3.245(4) ? . .
H(4) C(4) 2.029(4) ? . .
H(4) C(6) 2.027(4) ? . .
H(4) C(6) 3.336(4) ? . 7_556
H(4) C(9) 3.206(4) ? . 7_556
H(4) C(10) 3.066(4) ? . 7_556
H(4) C(11) 2.939(4) ? . 7_556
H(4) C(12) 2.928(3) ? . 7_556
H(4) C(13) 3.064(3) ? . 7_556
H(4) C(14) 3.204(4) ? . 7_556
H(4) H(3) 2.330(3) ? . .
H(4) H(4) 3.535(3) ? . 7_556
H(4) H(5) 2.327(3) ? . .
H(4) H(5) 2.671(4) ? . 7_556
H(4) H(8) 3.509(3) ? . 1_565
H(4) H(8) 3.095(3) ? . 7_546
H(4) H(8) 3.412(3) ? . 7_556
H(4) H(9) 3.395(3) ? . 7_556
H(4) H(10) 3.583(3) ? . 7_556
H(5) C(1) 2.033(4) ? . .
H(5) C(2) 3.253(4) ? . .
H(5) C(4) 3.245(3) ? . .
H(5) C(5) 2.025(3) ? . .
H(5) C(5) 3.341(5) ? . 7_556
H(5) C(7) 2.661(4) ? . .
H(5) C(8) 2.949(4) ? . .
H(5) C(9) 2.948(3) ? . .
H(5) C(10) 3.173(3) ? . .
H(5) C(10) 3.557(3) ? . 1_565
H(5) C(11) 3.336(3) ? . 1_565
H(5) H(4) 2.327(3) ? . .
H(5) H(4) 2.671(4) ? . 7_556
H(5) H(5) 3.549(5) ? . 7_556
H(5) H(7) 3.191(3) ? . .
H(5) H(7) 3.232(3) ? . 1_565
H(5) H(8) 2.811(4) ? . 1_565
H(5) H(12) 3.562 ? . .
H(5) H(14) 3.080 ? . .
H(6) O(1) 3.061(3) ? . .
H(6) O(1) 2.547(2) ? . 3_556
H(6) N(1) 3.225(3) ? . .
H(6) C(1) 3.326(3) ? . .
H(6) C(7) 1.941(2) ? . .
H(6) C(8) 3.573(4) ? . 3_556
H(6) C(9) 2.070(4) ? . .
H(6) C(10) 3.264(4) ? . .
H(6) C(14) 2.644(4) ? . .
H(6) C(15) 2.503(3) ? . .
H(6) C(15) 3.152(3) ? . 3_556
H(6) C(16) 3.577(3) ? . .
H(6) C(16) 3.483(4) ? . 3_566
H(6) C(17) 3.520(3) ? . 3_566
H(6) H(6) 2.946(4) ? . 3_556
H(6) H(7) 3.519(3) ? . .
H(6) H(11) 2.479(4) ? . .
H(6) H(13) 3.054 ? . 1_545
H(6) H(13) 2.560 ? . 3_566
H(6) H(14) 2.994 ? . .
H(6) H(15) 3.132 ? . 3_566
H(6) H(16) 3.177 ? . 3_566
H(7) C(1) 2.769(3) ? . .
H(7) C(2) 3.384(3) ? . .
H(7) C(6) 3.030(3) ? . .
H(7) C(7) 2.941(4) ? . .
H(7) C(8) 2.691(3) ? . .
H(7) C(9) 2.036(3) ? . .
H(7) C(11) 2.033(4) ? . .
H(7) C(12) 3.260(4) ? . .
H(7) C(14) 3.257(3) ? . .
H(7) C(16) 3.221(5) ? . 1_545
H(7) H(5) 3.232(3) ? . 1_545
H(7) H(5) 3.191(3) ? . .
H(7) H(6) 3.519(3) ? . .
H(7) H(8) 2.332(4) ? . .
H(7) H(8) 2.954(4) ? . 7_546
H(7) H(12) 2.813 ? . 1_545
H(7) H(13) 3.448 ? . 1_545
H(7) H(14) 2.916 ? . 1_545
H(8) C(4) 3.326(4) ? . 7_546
H(8) C(5) 3.031(4) ? . 7_546
H(8) C(6) 3.582(4) ? . 1_545
H(8) C(6) 3.436(4) ? . 7_546
H(8) C(9) 3.268(4) ? . .
H(8) C(10) 2.032(4) ? . .
H(8) C(10) 3.330(3) ? . 7_546
H(8) C(11) 3.313(3) ? . 7_546
H(8) C(12) 2.036(3) ? . .
H(8) C(13) 3.256(3) ? . .
H(8) H(3) 3.575(4) ? . 7_546
H(8) H(4) 3.509(3) ? . 1_545
H(8) H(4) 3.095(3) ? . 7_546
H(8) H(4) 3.412(3) ? . 7_556
H(8) H(5) 2.811(4) ? . 1_545
H(8) H(7) 2.332(4) ? . .
H(8) H(7) 2.954(4) ? . 7_546
H(8) H(8) 2.917(3) ? . 7_546
H(8) H(9) 2.331(3) ? . .
H(9) O(1) 3.497(2) ? . 4_554
H(9) C(3) 3.140(4) ? . 7_546
H(9) C(4) 2.877(4) ? . 7_546
H(9) C(5) 3.573(3) ? . 7_546
H(9) C(10) 3.258(4) ? . .
H(9) C(11) 2.033(4) ? . .
H(9) C(13) 2.037(4) ? . .
H(9) C(14) 3.260(4) ? . .
H(9) C(17) 3.491(3) ? . 4_554
H(9) H(1) 3.052(4) ? . 4_554
H(9) H(2) 3.202(5) ? . 7_546
H(9) H(3) 2.757(3) ? . 7_546
H(9) H(4) 3.395(3) ? . 7_556
H(9) H(8) 2.331(3) ? . .
H(9) H(10) 2.340(4) ? . .
H(9) H(16) 3.544 ? . 4_554
H(9) H(17) 2.883 ? . 4_554
H(10) O(1) 2.425(3) ? . 4_554
H(10) C(9) 3.276(3) ? . .
H(10) C(11) 3.257(3) ? . .
H(10) C(12) 2.032(3) ? . .
H(10) C(14) 2.039(4) ? . .
H(10) C(14) 3.343(3) ? . 2_555
H(10) C(15) 3.321(4) ? . 4_554
H(10) C(17) 3.328(3) ? . 4_554
H(10) H(1) 3.507(5) ? . 4_554
H(10) H(3) 2.997(4) ? . 7_556
H(10) H(4) 3.583(3) ? . 7_556
H(10) H(9) 2.340(4) ? . .
H(10) H(10) 3.367(4) ? . 2_555
H(10) H(11) 2.344(4) ? . .
H(10) H(11) 2.789(3) ? . 2_555
H(10) H(16) 3.299 ? . 4_564
H(10) H(17) 2.425 ? . 4_554
H(11) O(1) 2.911(4) ? . 3_556
H(11) C(8) 2.603(3) ? . .
H(11) C(9) 2.033(3) ? . .
H(11) C(10) 3.253(3) ? . .
H(11) C(12) 3.257(4) ? . .
H(11) C(13) 2.039(4) ? . .
H(11) C(13) 3.557(3) ? . 2_555
H(11) C(17) 3.252(4) ? . 3_566
H(11) H(6) 2.479(4) ? . .
H(11) H(10) 2.344(4) ? . .
H(11) H(10) 2.789(3) ? . 2_555
H(11) H(11) 3.339(3) ? . 2_555
H(11) H(15) 3.016 ? . 3_566
H(11) H(16) 2.646 ? . 3_566
H(11) H(17) 3.450 ? . 3_556
H(12) O(1) 3.331 ? . 1_565
H(12) N(1) 1.984 ? . .
H(12) C(1) 3.262 ? . .
H(12) C(2) 3.555 ? . 1_565
H(12) C(3) 3.302 ? . 6_556
H(12) C(6) 3.524 ? . .
H(12) C(7) 3.157 ? . .
H(12) C(7) 3.406 ? . 1_565
H(12) C(8) 3.530 ? . 1_565
H(12) C(10) 3.449 ? . 1_565
H(12) C(15) 2.889 ? . .
H(12) C(17) 2.918 ? . .
H(12) H(1) 3.157 ? . 1_565
H(12) H(2) 2.528 ? . 6_556
H(12) H(3) 3.183 ? . 6_556
H(12) H(5) 3.562 ? . .
H(12) H(7) 2.813 ? . 1_565
H(12) H(13) 1.551 ? . .
H(12) H(14) 1.551 ? . .
H(12) H(15) 3.514 ? . .
H(12) H(16) 2.779 ? . .
H(12) H(17) 3.548 ? . .
H(13) O(1) 2.780 ? . 1_565
H(13) N(1) 1.978 ? . .
H(13) N(1) 3.328 ? . 3_566
H(13) C(7) 3.230 ? . 1_565
H(13) C(8) 3.032 ? . 1_565
H(13) C(8) 3.418 ? . 3_566
H(13) C(15) 3.172 ? . .
H(13) C(15) 3.380 ? . 1_565
H(13) C(15) 3.461 ? . 3_566
H(13) C(17) 2.509 ? . .
H(13) H(6) 3.054 ? . 1_565
H(13) H(6) 2.560 ? . 3_566
H(13) H(7) 3.448 ? . 1_565
H(13) H(12) 1.551 ? . .
H(13) H(13) 3.542 ? . 3_566
H(13) H(14) 1.551 ? . .
H(13) H(14) 3.345 ? . 3_566
H(13) H(15) 2.701 ? . .
H(13) H(15) 3.184 ? . 3_566
H(13) H(16) 2.391 ? . .
H(13) H(17) 3.403 ? . .
H(14) N(1) 1.985 ? . .
H(14) N(1) 3.478 ? . 3_566
H(14) C(1) 3.126 ? . .
H(14) C(6) 3.361 ? . .
H(14) C(7) 2.497 ? . .
H(14) C(8) 2.927 ? . .
H(14) C(8) 3.585 ? . 1_565
H(14) C(9) 3.510 ? . 1_565
H(14) C(10) 3.180 ? . 1_565
H(14) C(15) 2.575 ? . .
H(14) C(17) 3.223 ? . .
H(14) C(17) 3.320 ? . 3_566
H(14) H(5) 3.080 ? . .
H(14) H(6) 2.994 ? . .
H(14) H(7) 2.916 ? . 1_565
H(14) H(12) 1.551 ? . .
H(14) H(13) 1.551 ? . .
H(14) H(13) 3.345 ? . 3_566
H(14) H(15) 3.490 ? . .
H(14) H(15) 2.509 ? . 3_566
H(14) H(16) 3.439 ? . .
H(15) O(1) 3.072 ? . .
H(15) N(1) 1.991 ? . .
H(15) C(8) 3.497 ? . 3_566
H(15) C(9) 3.467 ? . 3_556
H(15) C(14) 3.552 ? . 3_556
H(15) C(15) 2.850 ? . .
H(15) C(16) 2.882 ? . .
H(15) C(16) 3.243 ? . 3_566
H(15) H(6) 3.132 ? . 3_566
H(15) H(11) 3.016 ? . 3_566
H(15) H(12) 3.514 ? . .
H(15) H(13) 2.701 ? . .
H(15) H(13) 3.184 ? . 3_566
H(15) H(14) 3.490 ? . .
H(15) H(14) 2.509 ? . 3_566
H(15) H(16) 1.551 ? . .
H(15) H(17) 1.551 ? . .
H(16) O(1) 3.589 ? . .
H(16) O(1) 3.072 ? . 1_565
H(16) N(1) 2.003 ? . .
H(16) C(14) 3.567 ? . 3_566
H(16) C(15) 3.160 ? . .
H(16) C(16) 2.553 ? . .
H(16) H(3) 2.884 ? . 6_556
H(16) H(6) 3.177 ? . 3_566
H(16) H(9) 3.544 ? . 4_555
H(16) H(10) 3.299 ? . 4_565
H(16) H(11) 2.646 ? . 3_566
H(16) H(12) 2.779 ? . .
H(16) H(13) 2.391 ? . .
H(16) H(14) 3.439 ? . .
H(16) H(15) 1.551 ? . .
H(16) H(17) 1.551 ? . .
H(17) O(1) 2.410 ? . .
H(17) N(1) 1.986 ? . .
H(17) C(12) 3.162 ? . 4_555
H(17) C(13) 2.924 ? . 4_555
H(17) C(14) 3.429 ? . 3_556
H(17) C(15) 2.505 ? . .
H(17) C(16) 3.231 ? . .
H(17) H(3) 3.552 ? . 6_556
H(17) H(9) 2.883 ? . 4_555
H(17) H(10) 2.425 ? . 4_555
H(17) H(11) 3.450 ? . 3_556
H(17) H(12) 3.548 ? . .
H(17) H(13) 3.403 ? . .
H(17) H(15) 1.551 ? . .
H(17) H(16) 1.551 ? . .


#==============================================================================

# Additional structures and associated data_? identifiers
# should be added at this point if there is more than one 
# structure analysis in the CIF.

#==============================================================================

#     End of CIF

#==============================================================================
